1 **Title:** Character integration, preadaptation, and the evolution of evolvability in apes

2 **Author:** Caroline Parins-Fukuchi\*<sup>1,2</sup>

3 <sup>1</sup>Department of Geophysical Sciences, University of Chicago, Chicago, IL, USA

4 <sup>2</sup>Department of Ecology and Evolutionary Biology, University of Michigan, Ann Arbor,  
5 MI, USA

6 \*Author for correspondence: [parinsfukuchi@uchicago.edu](mailto:parinsfukuchi@uchicago.edu)

7 **Data archived online:** [https://figshare.com/articles/parins-fukuchi\\_sup\\_zip/8063726](https://figshare.com/articles/parins-fukuchi_sup_zip/8063726)

8

### 9 **Funding**

10 A portion of this work was carried out while the author was supported by a Predoctoral  
11 Fellowship provided by the Rackham Graduate School at the University of Michigan.

12

### 13 **Acknowledgements**

14 I wish to thank D Alvarado-Serrano, M Cosman, CW Dick, DC Fisher, LM MacLatchy,  
15 H Marx, J Saulsbury, SA Smith, N Walker-Hale for conversations that have greatly  
16 benefitted this work. I also thank S Worthington for help accessing his skeletal  
17 measurements that comprised a large portion of the character matrix analyzed here. I also  
18 think P Wagner and one anonymous reviewer for comments that substantially improved  
19 the manuscript.

20

21

22

23 **Abstract:** A central research program in evolutionary biology over the past 50 years has  
24 involved interpreting macroevolutionary patterns, such as key innovation and  
25 preadaptation, as mediated by interactions between single phenotypic traits and shifting  
26 ecological landscapes. While this focus has generated substantial evidence for the  
27 potency of environmental pressures in driving evolutionary changes, it has also created  
28 conceptual frustrations. I present analyses of a character matrix sampled across the  
29 haplorrhine skeleton that revealed several suites of integrated characters displaying  
30 distinct patterns in macroevolutionary disparity throughout the Miocene. Comparison of  
31 these patterns to those in neurological development revealed general support for a pattern  
32 in evolutionary and developmental flexibility shared by all great apes. Shifting and  
33 reduced constraint in apes was met with episodic bursts in phenotypic innovation that  
34 built a wide array of functional diversity over a foundation of shared developmental and  
35 anatomical structure that was laid throughout the Miocene. Notably, both apes'  
36 exceptional morphological disparity and humans' phenotypic distinctiveness can both be  
37 explained by earlier shifts in integration. These patterns demonstrate that relaxation of  
38 integration can correspond to enhanced evolvability that has a 'preadaptive' effect by  
39 catalyzing later episodes of dramatic morphological remodeling.

40 **Keywords:** integration, evolvability, preadaptation, diversification, hominoidea

41

42

43

44

## 45 **Introduction**

46           Developing a better understanding of the adaptive drivers of evolutionary change  
47 has long been a central goal in paleontology and comparative biology. When inquiring at  
48 macroevolutionary timescales, it is generally not possible to reconstruct natural selection  
49 regimes operating at the population level. However, researchers have long analyzed  
50 patterns in phenotypic evolution within the context of ecological and environmental shifts  
51 to better understand the adaptive landscape underlying major shifts in body plan and the  
52 emergence of novel biological functions (Simpson 1944). For example, many  
53 comparative studies seek to identify correlations between macroevolutionary  
54 diversification (encompassing both phenotypic disparity and speciation) and the  
55 emergence and colonization of new ecological niches. Many of these studies have found  
56 that shifts in the evolutionary rate of phenotypic characters, such as body size, coincide  
57 with those in ecological traits, such as climatic variables and biogeography (Harmon et  
58 al., 2003, Losos et al., 2006, Mahler et al., 2013, Slater and Friscia 2018). There is also  
59 evidence in some taxa that elevated rates of phenotypic evolution may sometimes  
60 correspond to elevated rates of lineage diversification (Rabosky et al. 2013; but see  
61 Crouch and Ricklefs 2019).

62           The early focus on environmental adaptation was first codified through the  
63 conceptual application of modern synthesis-era population genetic theory to questions at  
64 the macroevolutionary scale. George Gaylord Simpson combined quantitative  
65 descriptions of selection, drift, and fitness landscapes developed during the synthesis to  
66 suggest that large evolutionary changes occur rapidly as species move between and

67 optimize their position within ‘adaptive zones’ shaped by ecology. In this illustration,  
68 each zone is represented as an adaptive peak on a multi-dimensional fitness landscape,  
69 each of which describes a locally optimal combination of phenotypes. Although initially  
70 maintaining position on a single peak due to stabilizing selection, Simpson hypothesized  
71 that genetic drift may cause species to descend and cross adaptive valleys, during which  
72 positive selection re-emerges to propel the species to a new peak. This image has been  
73 influential, providing the theoretical basis for major evolutionary concepts. For example,  
74 large evolutionary radiations are often hypothesized be limited in their intensity by the  
75 availability of new ecological opportunities through environmental changes or  
76 improvement of competitive ability (Rainey and Travisano 1998, Yoder et al., 2010,  
77 Wagner and Harmon et al 2012, but see Slater 2015).

78         The role of ecological processes in generating morphological novelty can be  
79 contrasted with an increasing focus on ‘constructional’ factors that include functional  
80 interactions and architectural constraints (Seilacher 1970, 1991). While character  
81 evolution may sometimes reflect simple optimization processes when natural selection  
82 operates independently on separate traits, the evolutionary pathways realized in nature are  
83 also constrained by the complex interactions between functionally dependent traits and  
84 the limitations of an organism’s developmental architecture. When placed into a broader  
85 evolutionary literature, these limiting factors might be coarsely partitioned into  
86 developmental (Gould and Lewontin 1979, Olson 2012) and functional (Charlesworth et  
87 al., 1982, Cheverud 1984, Maynard-Smith et al., 1985) constraints.

88           One characterization of developmental constraint involves the tight linkage of  
89 characters in ontogeny through factors that include allometry and modularity. When traits  
90 are developmentally linked, but functionally autonomous, the available set of selectively  
91 advantageous modifications belonging to one is limited by the fitness effect on the other.  
92 Wagner and colleagues (2007) formulated an example of such patterns using vertebrate  
93 limbs. While fore- and hindlimbs are functionally independent in many species, their  
94 shared origin as serial homologs causes quantitative variation in each set of limbs to be  
95 correlated through their linkage in development. Developmental constraints are also  
96 frequently characterized by the set of fundamental limitations imposed on an organism's  
97 form by its developmental programming. This article will focus most heavily on the  
98 former aspect of developmental constraint.

99           Functional constraint exists when multiple traits contribute to a shared function  
100 that is under selection and/or when a single trait performs multiple functions that are each  
101 under selection. Although any particular trait may perform many functions that contribute  
102 to fitness in different ways, the phenotype for each trait that contributes to a shared  
103 function that is under strong selection will be limited to values that facilitate its  
104 contribution alongside the other constituent traits.

105           Shared developmental pathways and multivariate selection, along with related  
106 processes such as epistasis and pleiotropy, can act and interact in complex ways to yield  
107 similar patterns. Although it is usually impossible to distinguish between each of these  
108 processes in historical, macroevolutionary study systems, they share a common tendency  
109 to drive the formation of modules of characters that are linked in their evolutionary

110 trajectories through a higher-level process traditionally referred to as ‘integration’ (Olson  
111 and Miller 1958). An understanding of integrated and modular evolution has facilitated  
112 study of the ways that Simpson’s classic conception of ecological adaptation at  
113 macroevolutionary scales is mediated by the multivariate complexity of reality. While  
114 ecological pressures undoubtedly shape evolutionary trajectories, developing a holistic  
115 understanding of the ways that development and the functional interdependence of  
116 characters constrain evolvability will enhance our knowledge of the macroevolutionary  
117 processes that drive the emergence of phenotypic novelty throughout deep time.

118       Developmental and functional constraints influence evolution in significant ways.  
119 For example, when ecological opportunity is abundant, evolutionary radiations can be  
120 driven primarily by the release of developmental constraints (Wagner et al. 2003). This  
121 conception runs the risk of false dichotomy between ecology and constraint in the sense  
122 that relaxed constraint may itself be driven by ecological factors, but this simplification  
123 does not negate the insight that both constraint and ecological opportunity can be limiting  
124 factors in clade disparification. Reductions in developmental constraint can also shape  
125 macroevolutionary patterns by driving increases in evolutionary rate (Donoghue and Ree  
126 2000). This pattern appears to hold for integration more generally, with higher degrees of  
127 integration often linked to lower evolutionary disparity and rate (Goswami et al. 2014,  
128 2015). Integration, as reflecting developmental and/or functional interactions between  
129 traits, may constrain the possible range of phenotypes that a character might display  
130 because of the fitness consequences of its modification upon other characters that are  
131 linked either by development or shared function.

132           Understanding the set of evolutionary limitations imposed by integration through  
133 development and functional constraints is crucial in determining the capacity for a clade  
134 to diversify phenotypically. Together, these factors might be said to determine the level  
135 of ‘constructional opportunity’ available at a given time. Considered in opposition to  
136 ecological opportunity (Losos 2010), constructional opportunity reflects the evolvability  
137 of a clade that is determined by the level of constraint imposed by the structure of  
138 developmental and functional interactions between characters, as well as other  
139 architectural considerations (Turing 1953, Raup 1966). While ecological opportunity is  
140 often evoked as a limiting factor on a clade’s phenotypic diversification, constructional  
141 opportunity may also limit the range of evolutionary modifications available to a  
142 population faced with ecological pressure.

143           Apes have been extensively studied in the context of both developmental  
144 constraint and environmental adaptation. Young et al. (2010), found that apes display  
145 weak integration between the fore- and hindlimb in comparison to cercopithecoids.  
146 Reduced integration can confer greater functional flexibility, and so may have facilitated  
147 the proliferation of the diverse locomotor function across living and fossil apes. Changes  
148 in developmental timing have also been important in ape evolution. Developmental  
149 heterochrony appears to have driven the emergence of many key aspects of hominin  
150 morphology in the cranium and post-cranium (Gould 1977, Berge 1998). This long-  
151 standing interest in the developmental basis of ape evolution has not excluded  
152 environmental hypotheses. Environmental fluctuations throughout the Miocene and  
153 Pliocene have also frequently formed the basis for adaptive hypotheses across apes

154 (Andrews 1992, Ruff 1994, Michel et al., 2014). The body plans of hominins, and  
155 undoubtedly apes in general, have been shaped through modifications to separate suites  
156 of traits occurring at different times (Holloway 1973, McHenry 1975). These diverse  
157 threads suggest that a multiplicity of causes, perhaps including both ecological  
158 opportunity and constructional factors, has shaped the evolution of hominoid body plans.  
159 As a result, apes are an excellent exemplar taxon in which to pluralistically examine the  
160 mosaic patterns in constraint and innovation that shape body plans in living and fossil  
161 vertebrates.

162         In this study, I sought to examine whether the relaxed integration shared by great  
163 apes corresponds to elevated rates of evolutionary disparification in morphological and  
164 developmental traits across all apes. To address these questions, I reconstructed the  
165 mosaic macroevolutionary patterns in morphological, neurological, and developmental  
166 phenotypes across living and fossil great apes throughout the Miocene. To help place  
167 these empirical results in a theoretical context, I also present a set of simple simulations  
168 to generate a theoretical expectation for the patterns in disparity expected when  
169 Markovian diffusion is constrained by both selection and development. Taken together,  
170 these analyses suggest the capability for shifting patterns in constraint to create  
171 constructional opportunities that generate repeated and dramatic episodes in  
172 morphological innovation.

## 173 **Methods**

### 174 *Morphological data*



175 I gathered a dataset of 149 quantitative morphological traits from the literature  
176 (Lewton 2010, Worthington 2012) spanning the cranium, forelimb, and pelvis. These  
177 traits were sampled across 10 extant taxa. I also collected fossil cranial and forelimb traits  
178 from Worthington (2012), retaining all taxa with at least 25% matrix occupancy. Taxa  
179 were all studied at the generic level, with each extant genus represented by a single  
180 exemplar species. Each morphological trait represented a dimensionless ratio or  
181 geometric mean. I scaled the traits to display an empirical variance of 1 across all taxa.  
182 This simplified the analyses by reducing the complexity of the dataset, while retaining the  
183 same comparative information. Since the original traits were dimensionless, both the  
184 unscaled and the scaled datasets would facilitate examination of *relative*, rather than  
185 absolute, evolutionary rates, but the scaled traits improve Markov-chain Monte Carlo  
186 (MCMC) mixing and simplify the identification of mosaic suites.

### 187 *Neurological data*

188 To directly study the evolutionary patterns in related developmental and  
189 phenotypic traits, I also gathered neurological data from the literature (Capellini et al.,  
190 2010, Boddy et al., 2012). For neurological phenotype, I collected encephalization  
191 quotients (EQ) estimated in 76 primate species by Boddy et al. (2012). EQ is calculated  
192 by fitting a nonlinear model to brain size and body size and taking the deviations  
193 (residuals) from the best fit curve and so measures the enlargement of brain size while  
194 controlling for allometry with body size. I compared EQ patterns to those in a postpartum  
195 encephalization development (ED) metric calculated as:

$$196 \quad ED = EQ_{adult} - EQ_{neonatal} \quad (1)$$

197 ED is therefore intended to reflect the amount of brain tissue grown by members of each  
198 species following birth relative to their body size. Neonatal brain and body mass data  
199 representing 24 primate species were acquired from Capellini et al. (2010).

#### 200 *Fossil placement and divergence time estimation*

201         Since the evolutionary relationships between the extant taxa represented in the  
202 morphological dataset have all been extensively studied and are well-resolved, I used  
203 these as a fixed scaffolding to place the fossil taxa. Fossil placements were inferred from  
204 the continuous trait dataset using the cophymaru program (Parins-Fukuchi 2018). I used  
205 the ‘binary weights’ procedure to filter out reliable traits from ones likely to mislead by  
206 using the extant tree as a fixed point of reference. Markov-chain Monte Carlo (MCMC)  
207 simulations were run for 1,000,000 generations and checked manually for convergence.  
208 The posterior tree sample was summarized as the maximum clade credibility tree using  
209 sumtrees.py (Sukumaran and Holder 2010).

210         For downstream comparative analyses, I also estimated divergence times on the  
211 full 19-taxon tree. I downloaded cytochrome B sequences from Genbank representing  
212 each of the 10 extant taxa. Molecular dating was performed using Beast version 2.4.8  
213 (Bouckaert et al. 2014) using the fossilized birth-death (FBD) prior. The topology was  
214 fixed to the summary tree generated during the fossil placement step. Temporal  
215 occurrence ranges for the fossil taxa were assembled from the literature. These fossil and  
216 extant occurrence ranges were used in the dating analysis to infer the diversification and  
217 sampling rate parameters used in the FBD prior.

#### 218 *Measuring evolutionary integration*

219 As a preliminary evaluation of the strength of integration in the skeletal traits  
220 across the haplorrhine phylogeny, I calculated the phylogenetic independent contrasts  
221 (PIC) (Felsenstein 1985) at each node in a tree of nine extant haplorrhine taxa (*Pan*  
222 *paniscus* was removed because it was missing pelvic measurements). At each internal  
223 node in the phylogeny, I then calculated the correlation between the vector of characters  
224 at each child node. Stronger correlations are expected to correspond to tighter integration.  
225 If the child represented an internal node, the PIC values were used as the character  
226 vector. PICs were calculated on the dated phylogeny, with the fossil taxa pruned.

227 *Evolutionary rates across mosaic morphological suites*

228 I used the *greedo* program to recover mosaic patterns in disparity from the  
229 continuous trait dataset (Parins-Fukuchi 2019). *Greedo* is a phylogenetic  
230 clustering/mixture model estimation approach that uses the Akaike information criterion  
231 (AIC) to iteratively merge and split clusters of traits to find a best-supported set of  
232 character suites based on shared patterns in disparity, where each is represented by a tree  
233 with branch lengths (Fig. 1). Traits that display the highest improvement in log-likelihood  
234 when assigned to a separate cluster are prioritized during the splitting steps to first  
235 identify likely sources of heterogeneity in the dataset. During the merging step, only  
236 clusters that show an improved AIC score when placed under the same model are joined.  
237 This process recovers an estimate of the number of suites, the membership of each trait,  
238 and a tree with branch lengths scaled to units of disparity for each suite. Fossil taxa were  
239 not included in the mosaic analyses, because they were too fragmentary in their sampling  
240 to inform disparity patterns when the traits were split into suites. I performed many runs

241 of the *greedo* procedure to avoid presenting results obtained from a suboptimal peak on  
242 the likelihood surface. Since several of the top clusterings yielded close AIC support, I  
243 performed an additional model-averaging step using Akaike weights to summarize the  
244 results as a graph where each trait occupies a node, and each link is weighted to reflect  
245 the total weighted AIC support across all the models. Comparative analyses were  
246 performed using a single summary clustering that resulted from application of the  
247 Markov clustering (MCL) algorithm to the support network (Dongen 2000).

248         To examine the anatomical composition of the mosaic suites of characters, I  
249 performed a statistical enrichment procedure to identify skeletal regions that were over  
250 and under-represented in each suite relative to the proportions for each present in the  
251 entire dataset. The proportion of the 149-trait dataset represented by each skeletal region  
252 was used to generate a set of ‘expected’ values. I then compared these to the observed  
253 proportions within each suite to examine trends in the deviations of the proportions  
254 occupied by each region. I did not assess the statistical significance of these deviations,  
255 because 1) my aim was to examine the general patterns in the composition of each  
256 character suite rather than to determine absolute significance, and 2) the small sample  
257 size of the dataset generated expected chi-square test statistic values that were nearly  
258 entirely  $<5$ , making the test inappropriate. To examine the relative contributions of  
259 separate anatomical regions in shaping the macroevolutionary patterns reconstructed in  
260 each suite, I also performed a principal component analysis (PCA) on the traits contained  
261 within each suite. I then transformed the loadings to calculate the total variance

262 contributed by each trait across all axes of the PCA, summing them to produce the  
263 contribution of each anatomical region.

264 I transformed the branch lengths for each mosaic suite, which were scaled to  
265 reflect disparity (total variance,  $v$ , accumulated over time  $t$ ), to rates ( $v$  per unit  $t$ ) using  
266 the results from the divergence time analysis. I also calculated evolutionary rates  
267 averaged over the entire morphological dataset while including the fossil taxa to coarsely  
268 reconstruct evolutionary tempo throughout the Miocene. Although this step missed  
269 valuable information recovered by the mosaic analyses, including the fossil taxa in this  
270 manner enabled finer resolution into the coarse patterns in evolutionary tempo throughout  
271 the Miocene.

#### 272 *Evolutionary rates in neurological data*

273 I estimated macroevolutionary rates across primates in ED and EQ using BAMM  
274 version 2.5.0 (Rabosky 2014). Since the trees that I constructed for the morphological  
275 analysis contained only a fraction of the taxa present in the neurological datasets, I used  
276 the dated primate supertree packaged in BAMM that was originally sourced from Mos  
277 and Mooers (2006) and pruned the tips to match the taxa present in each dataset. MCMC  
278 simulations were run until the estimated sample size (ESS) well exceeded 200 for each  
279 parameter. Results were presented by plotting the mean rate estimated along each branch  
280 and the maximum *a posteriori* configuration of rate shifts using BAMMtools version  
281 2.5.0 in R (Rabosky et al., 2014).

#### 282 *Lineage diversification rate analyses*

283 I performed analyses of origination and extinction rates in hominoid and  
284 cercopithecoid fossil records to examine the correspondence between lineage  
285 diversification and the patterns in disparification emphasized in the analyses of  
286 morphological rates and mosaicism. Fossil occurrence data spanning primates were  
287 acquired from the Paleobiology Database ([paleobiodb.org](http://paleobiodb.org)) on July 31, 2019. This dataset  
288 was partitioned into two subsets: one encompassing Hominoidea and the other  
289 representing Cercopithecoidea. Rates of origination and extinction were inferred from  
290 each subset separately using PyRate (Silvestero et al. 2014). The inferential model was  
291 constrained to contain uniform origination and extinction rates across time, thus ignoring  
292 the possibility of diversification shifts within each clade. Preservation was constrained to  
293 being time-homogeneous and was assumed to be uniform within each clade. While  
294 ignoring potential information regarding diversification rate heterogeneity through time,  
295 this simplified model matches classic paleobiological work that assumes simple birth-  
296 death-sampling models and was therefore appropriate for the sister clade comparison of  
297 average diversification rates while avoiding possible model overfitting that may  
298 obfuscate the straightforward test sought here.

### 299 *Simulated Markovian diffusion*

300 To examine the expected effect of constructional opportunity stemming from both  
301 developmental and functional constraint on phenotypic evolution, I designed a set of  
302 evolutionary simulations based on a simple Markovian diffusion. In this system,  
303 quantitative traits belonging to a single population of organisms evolve stochastically  
304 along a fitness landscape. Each generation, values for each trait are proposed. Values that

305 increase the overall fitness of the population are accepted. To mimic the effect of drift,  
306 values that decrease fitness are also accepted with some (user-specified) probability.  
307 Developmental constraint can be mimicked by proposing values for traits that covary,  
308 while functional constraints are modeled by evolving traits along a shared, multivariate  
309 adaptive landscape, modelled here using a mixture of multivariate Gaussian distributions.  
310 In a completely unconstrained system, each trait is evolved according to its own  
311 univariate landscape, with its value drawn independently of all others in each generation.  
312 Performing simulations in this way facilitated an illustration of the potential for  
313 functional and developmental integration to constrain evolutionary rates in an adaptive  
314 landscape. Although distinguishing between these modes of integration is generally  
315 difficult or impossible in paleontological study systems, the simulations performed here  
316 provide insight by testing 1) the potential for varying systems of integration to catalyze or  
317 constrain adaptive change and 2) the extent to which functional and developmental  
318 integration generate overlapping and distinct patterns in evolutionary rate and disparity.  
319 When placed in a macroevolutionary context, the simulations here should be thought of a  
320 demonstration of the possible microevolutionary processes that may have driven the  
321 higher-level patterns in evolutionary rate occurring along a single phylogenetic branch in  
322 the mosaic analyses. The script used to generate these simulations is available in the data  
323 supplement.

## 324 **Results and Discussion**

325 *Strength of integration throughout the haplorrhine radiation*

326 Calculating character correlations from the skeletal data and PICs at each internal  
327 node in the extant haplorrhine phylogeny revealed two episodes of reduced integration  
328 (Fig. 2). The first occurred at the root of Hominoidea, where the correlation decreased  
329 from -0.21 at the ancestor of catarrhines, to -0.06 at the root of hominoids. The second  
330 episode occurred in the ancestor of chimpanzees and humans, decreasing from 0.09 to  
331 0.02. This show that the reduction in integration across apes between the fore- and  
332 hindlimbs revealed by Young and colleagues (2009) extends across the skeleton. In  
333 contrast, both cercopithecoids (0.24 correlation) and platyrrhines (0.16 correlation)  
334 display substantially higher integration than was observed in any of the ape hypothetical  
335 ancestors.

### 336 *Composition of mosaic suites*

337 The analysis of mosaic disparity recovered five suites of traits (Fig 3a). The  
338 cranium was the largest contributor of both traits and variance across all suites except for  
339 C4, which was represented by the pelvis alone (Fig. 3b and 3c). This reflects the higher  
340 sampling of cranial traits in the dataset. While the cranium has previously been shown to  
341 display substantial modularity (Felice and Goswami 2017), the results here suggest that  
342 individual cranial modules may result from the formation of broader evolutionary  
343 complexes shared with the post-cranium. The suites were distinct in their composition  
344 across postcranial anatomy: C0 was represented strongly by the wrist, ulna, and humerus;  
345 C1 was represented postcranially by the scapula; C2 by wrist and pelvic traits. The  
346 cranium was represented even more strongly than expected in C3 and contributed nearly  
347 half of the variance (Fig. 3b).



348 *Rates of morphological evolution*

349           The phylogenetic rate calculations for each suite revealed a strong pattern of  
350 evolutionary mosaicism (Fig. 3a). Three of the suites, C0, C1, and C3, displayed the  
351 highest rates after the divergence of the great apes from hylobatids, but before the  
352 divergence of gorillas from humans and chimpanzees. The two suites that did not  
353 experience the shared great ape rate increase, C2 and C4, experienced large bursts in  
354 *Homo*. This finding is consistent with general knowledge of human evolution, as both  
355 suites are dominated by cranial traits and pelvic traits related to birthing and locomotor  
356 function (Table S1).

357           The rate analyses show that humans have experienced major macroevolutionary  
358 bursts. However, these are built over an anatomical structure shared by all great apes that  
359 was shaped in the Miocene during similarly dramatic episodes. For example, although  
360 suite C0 increased in evolutionary rate along the human branch, its evolution was shaped  
361 by a sustained period of elevated rate between 20 and 10 million years ago. This suggests  
362 that much of the ‘groundwork’ underlying the derivation of humans’ unique features may  
363 predate the divergence between our lineage and chimpanzees’. The mosaic analysis also  
364 demonstrates that substantial visible phenotypic novelty can result from the evolutionary  
365 remodeling of a small subset of the anatomy. The most elevated evolutionary rates in  
366 humans were observed in suites C2, C3, and C4, which cumulatively comprise fewer than  
367 one-third of the traits sampled in the matrix (Table S1). C4, the smallest suite (10 traits)  
368 displayed by far the largest increase in rate along the *Homo* lineage. Perhaps notably, C4  
369 also was the most static character suite throughout the earlier stages in the hominoid

370 radiation. Although enumerating characters does not itself constitute a particularly  
371 compelling independent line of evidence from which to interpret macroevolutionary  
372 trends, the mosaic pattern recovered here does suggest that the subset of biological  
373 variation unique to the human body plan is fairly small in comparison to the wide  
374 spectrum of evolutionary variance accumulated throughout ape evolution.

375         While the large amounts of missing data among the fossil taxa made an additional  
376 mosaic analysis infeasible, their inclusion revealed an otherwise hidden shift in  
377 evolutionary rate that occurred at the root of hominoidea (approximately 30 million years  
378 ago). The fossil data also recapitulated the burst in evolutionary rate during the mid-  
379 Miocene that was displayed by C0 and C1 in the mosaic analysis (Fig. 3 and 4). When  
380 averaging over all the traits and including fossil taxa, these two episodes are the most  
381 dramatic macroevolutionary events when tracing the evolutionary lineage leading to  
382 *Homo*, suggesting the importance of early shifts in the ape body plan in shaping the  
383 functional morphologies of living taxa.

#### 384 *Rates of neurological evolution*

385         As with morphology, all great apes appear to have differentiated rapidly from  
386 other catarrhines in both EQ and ED. *Homo* displays the highest rate of both EQ and ED  
387 evolution. However, the human rate shift in both traits occurred as part of an older trend  
388 of rapid neurological evolution in African apes. For EQ, humans experienced a  
389 substantial increase in evolutionary rate relative to the rest of the African apes, despite  
390 the statistical evidence for a shared rate shift at the root of the clade (Fig. 5b). The shared  
391 macroevolutionary regime shared by all African apes is most apparent in encephalization

392 development (Fig. 5a), where the estimated evolutionary rate in *Homo* increased only  
393 slightly after splitting from *Pan* (Fig. 5c). It appears that the increased encephalization  
394 developed throughout the post-natal period in humans reflects a general trend among  
395 great apes in the evolutionary plasticity of neurological development. As a result, the  
396 ability to develop a relatively large mass of brain tissue does not itself appear to be a  
397 strong limiting factor in the evolution of large encephalization in humans. Instead, the  
398 morphological analyses suggest that pelvic traits (C4 in Fig. 1) may have demanded a  
399 more dramatic alteration in macroevolutionary regime.

#### 400 *Structural and ecological opportunity in ape evolution*

401 The elevated evolutionary rates experienced by apes early in their divergence  
402 appear to correspond to a general relaxation of constraint in early Miocene stem and  
403 ancestral hominoids. The reduction in integration across the skeleton and burst in the  
404 evolutionary rate of neurological development that occur at the base of the hominoid  
405 clade correspond in timing to the elevated rates in morphological evolution observed in  
406 most of the skeletal characters examined here (Fig. 3 and 4). Freed from previous  
407 functional and developmental limitations, ape body plans would have rapidly diversified  
408 when placed in the context of the repeated environmental fluctuations that occurred  
409 throughout the mid and late Miocene (Michel et al. 2014, Hunt 2016) before becoming  
410 functionally canalized through development and stabilizing selection. This pattern is  
411 consistent with a scenario in which morphological features evolve by stochastic diffusion  
412 on a Simpsonian adaptive landscape that is alternately dampened and released by relaxed  
413 and shifting patterns in character integration.

414           Rapid and frequent environmental fluctuations throughout the Miocene suggest an  
415 abundance of theoretically available adaptive zones during the evolution of both  
416 cercopithecoids and hominoids. Paleoecological information extracted from deposits  
417 containing key hominoid taxa are so variable that environmental turnover often outpaces  
418 the effects of time-averaging (Michel et al. 2014). Early Miocene ape and monkey  
419 species evolved in often overlapping environmental conditions and shared similar  
420 ecomorphological and dietary habits. However, as their lineages diverged, apes evolved a  
421 diverse set of locomotor suites, while evolution in locomotor features has remained  
422 comparatively static across old world monkeys (Hunt 2016). The patterns in  
423 developmental and mosaic morphological evolution revealed here suggest that the  
424 substantial differences between the two taxa in phenotypic disparity were shaped more by  
425 differences in patterns in integration and constraint rather than from the ecological  
426 opportunities available to either. While hominoids and cercopithecoids inhabited a  
427 similar range of habitats throughout their evolution, and so likely experienced a similar  
428 abundance of ecological opportunity, greater constructional opportunity is a  
429 distinguishing feature that correlates with hominoids' vast disparity in skeletal  
430 morphology.

431           The scenario entertained here for apes is consistent with recent work that suggests  
432 that the initial burst in phenotypic disparity that often accompanies the origin of a new  
433 lineage can result from an early relaxation of constraints through the dissolution of  
434 integrated modules that is followed by reformation of character suites that lead to rapid,  
435 correlated evolutionary changes between constituent characters (Wagner 2018). In the

436 cited work, the author distinguishes this ‘breakup-relinkage’ model with one where  
437 evolutionary rates are elevated by a relaxation of constraint alone. Although in this study,  
438 I have focused most of the discussion on the relaxation of constraints, the formation of  
439 mosaic character suites and their distinct evolutionary patterns imply a strong pattern of  
440 integration within apes. This is reflected in the ancestral correlation patterns, which show  
441 that an initial decrease in integration at the root of hominoids was followed by an  
442 increase at the following node (Fig. 2). Therefore, the recanalization of functional  
443 variation into a set of suites with distinct functional and developmental properties early in  
444 hominoid variation is likely equally important to the initial relaxation in constraint in  
445 having driven the remarkable morphological disparity observed across hominoid species.

446 *“Preadaptation” and developmental enablers in apes*

447         Bursts in phenotypic change and diversification are often preceded by  
448 evolutionary enablers that facilitate the construction of more diverse morphological forms  
449 or fulfill a necessary condition for the later emergence of a more derived trait. Such  
450 patterns have been suggested to stem from higher-level processes variously referred to as  
451 “preadaptation” (Bock 1959), “exaptation” (Gould and Vrba 1982), and “developmental  
452 enablement” (Donoghue 2005). The evolution of developmental, morphological, and  
453 behavioral traits is often hierarchical through functional inter-dependencies and  
454 temporally autocorrelated, with changes in traits at relatively lower levels ‘setting the  
455 stage’ for higher-level traits by providing the developmental or structural conditions  
456 necessary for their emergence. The stepwise macroevolutionary bursts observed here  
457 show that hominoid evolution has been defined by sequential, episodic releases in

458 constraint that likely set the stage for later innovations that compounded upon earlier  
459 rearrangements in the structure of developmental and functional integration.

460         The related concepts of preadaptation, exaptation, and developmental enablement  
461 all focus on identifying the origin of single characters that facilitate the later emergence  
462 of more derived states. However, the patterns presented here suggest that such processes  
463 may often be better characterized as reflecting larger changes in developmental and  
464 functional character-linkage systems rather than by the sequential derivation of individual  
465 characters. The dramatic bursts in evolutionary rate that occur in the largest character  
466 suites coincide with or immediately follow the reduction in integration that occurred at  
467 the root of hominoids. This suggests that a general shift in functional and/or  
468 developmental integration occurred near this time. This shift precedes and, although  
469 speculative, may have resulted in a general predisposition across apes that facilitated the  
470 later functional divergence of later species into an unusually broad range of habits.  
471 Therefore, rather than stemming from a single “preadaptive” character, the morphological  
472 disparity of apes and the emergence of features derived in single lineages (such as  
473 bipedalism in humans) may be better explained by a shift in developmental and  
474 functional integration patterns earlier in ape evolution.

475         To provide a specific example, the effect of the enhanced evolvability conferred  
476 by reduced integration appears to have contributed to the emergence of key human traits.  
477 Suites C2 and C3 from the morphological analysis, represented disproportionately by the  
478 cranium and pelvis, experienced an initial burst in evolutionary rate along the branch  
479 leading to humans and chimpanzees. This was then followed by dramatic bursts in *Homo*

480 (Fig. 3). Likewise, EQ and ED have been evolving rapidly throughout the ape radiation,  
481 with ED experiencing an initial increase in evolutionary rate before the splitting of  
482 gorillas, chimps, and humans followed by more dramatic upticks of rate in humans in  
483 both traits (Fig. 5c). The occurrence of evolutionary rate shifts in traits important to  
484 humans earlier in the great ape clade reflects the increased evolvability shared by all  
485 apes. In addition, comparison of the human-specific evolutionary rates in cranial, pelvic,  
486 and neurological traits to the varying strength of skeletal integration throughout hominoid  
487 evolution show that the elevated rates in humans were immediately preceded by a  
488 substantial decrease in constraint, recapitulating a similar pattern to the co-occurring  
489 shifts in evolutionary rate and integration earlier in ape evolution. This result provides  
490 independent evidence of the “preadaptive” potency of shifts in integration in promoting  
491 rapid and dramatic evolutionary remodeling of morphology.

492         Although demanding more detailed exploration with more resolute data, it is  
493 possible that the initial bursts in ED and suite C2 and C3 evolution, coupled with the  
494 reduced integration at the ancestor of chimp and humans, may reflect a set of structural  
495 rearrangements that facilitated, at least in part, the later emergence of human-specific  
496 neurological and cognitive features. This scenario echoes the results of Rice (1998), who  
497 demonstrated that humans and chimpanzees, to the exclusion of gorillas, both inherited a  
498 shared ‘additional’ stage of brain development from our most recent common ancestor. It  
499 is therefore possible that chimpanzees possess more of the neurological and cranial  
500 groundwork that contributed to the evolution of humans’ particular mode of cognition  
501 than has previously been appreciated.

502           The patterns uncovered here suggest that many evolutionary studies focusing on  
503 preadaptation and exaptation would benefit by shifting focus from individual features to  
504 patterns in integration and modularity across broad suites of characters. Although the  
505 concept is essentially unchanged as applied to integration patterns, it may be more  
506 accurate in the example here to refer instead to an ‘evolutionary predisposition’ given the  
507 lack of evidence for a specific sequence of selective regimes (Smith et al. 2018). This  
508 semantic argument is likely also valid in more traditional examples of single trait  
509 exaptations or preadaptations. And so, a generalization from preadaptation or exaptation  
510 to evolutionary predisposition that 1) incorporates integration patterns and 2) shifts  
511 emphasis from adaptation, which makes assumptions about the (often unknowable) set of  
512 historical microevolutionary processes, to the sequence of observable states in both  
513 characters and integration patterns can provide a stronger conceptual basis for future  
514 work that considers contingency and sequential order in the evolutionary pathways of  
515 complex traits. Although this reconceptualization might superficially appear to de-  
516 emphasize evolutionary process in favor of pattern, I would instead argue that  
517 constraining the scale of inquiry and incorporating a broader range of biological  
518 complexity can facilitate the reconstruction of elusive higher-level macroevolutionary  
519 processes that shape organismal diversification and disparification over deep timescales.  
520 This formulation also avoids the conceptual and practical frustrations that occur when  
521 attempting to invoke the concepts of preadaptation and exaptation to explain evolutionary  
522 history over deep timescales by reducing dependency on knowledge of lower-level  
523 population processes.



524 *Diversification and disparification in haplorrhine evolution*

525 Cercopithecoids have diversified at over twice the rate as hominoids over the  
526 same time scale (Table 1). One limitation of these analyses stems from cercopithecoids'  
527 somewhat poor fossil record as compared to hominoids. Nevertheless, the difference in  
528 preservation rates estimated in each clade (~3 in apes compared to ~2.6 in  
529 cercopithecoids) should ameliorate some of the potential effect of this bias on parameter  
530 estimates. The general pattern of higher net diversification in cercopithecoids is also  
531 consistent with previous neontological results (Purvis et al. 1995), suggesting that the  
532 paleontological estimates presented here are adequately robust to these effects. This  
533 difference in lineage diversification rates between both taxa demonstrates that increased  
534 morphological disparification is, overall, not correlated with faster lineage diversification  
535 in haplorrhine primates. While the evolutionary predisposition conferred upon apes by  
536 their relaxed integration corresponds to an increase in morphological disparity, this effect  
537 does not extend to lineage diversity.

538 On the surface, the overall similarity in the environments, dietary niches, and  
539 geographical ranges of hominoids and cercopithecoids suggests that cercopithecoids have  
540 a selective advantage in the species-sorting dynamics between the two clades. However,  
541 the long-term persistence of hominoids and their remarkable innovation in locomotor  
542 function relative to cercopithecoids throughout this timespan suggests an equilibrium in  
543 their relative abundances (Van Valen 1975, Chesson 2000). Although cercopithecoids  
544 experienced less disparification in postcranial morphology, they display a broader range  
545 of derived digestive physiologies, including both intestinal and dental features, associated

546 with food processing (Hunt 2016). Given these observations, it is possible that the  
547 differential in diversification rate between cercopithecoids and hominoids stems from  
548 differences in the timescales of their life histories and other factors not directly related to  
549 interspecific competitive ability. If this is the case, hominoids may achieve steady  
550 persistence through higher evolvability conferred by reduced integration and increased  
551 developmental flexibility when faced with changing environments, while cercopithecoids  
552 may do so through a combination of their higher net diversification rates and capability to  
553 exploit a range of dietary resources through their digestive physiologies. Such differences  
554 would be consistent with an equilibrium model of coexistence rather than a simple  
555 species selection model that predicts the ultimate extinction of hominoids through  
556 competitive exclusion by cercopithecoids. Nevertheless, more rigorous comparison of  
557 each of these attributes in both lineages is needed to further constrain the range of  
558 possible explanatory factors.

559 *Constrained Markovian diffusion and entropy*

560       The patterns in character disparity shown here evoke a Markovian diffusion that is  
561 dampened by constraint. The tightly integrated nature of vertebrate body plans suggests  
562 major constraints in their ability to fill morphospace. However, the pattern displayed by  
563 apes suggests that the structure of integration may sometimes shift, allowing diffusion  
564 into new areas. Morphological evolution might then be conceived as a multivariate  
565 diffusion in morphospace where movement is directionally biased due to fitness  
566 differences modelled by a traditional Simpsonian adaptive landscape and certain regions  
567 are rendered inaccessible by structural interactions between characters. Although this

568 diffusive model, including the feedback links between phenotype, development, and  
569 environment, has been considered previously (Fisher 1986), its behavior has not been  
570 well explored in this context.

571         The Monte Carlo simulations presented here provide a theoretical illustration of  
572 the population-level dynamics stemming from one possible set of integration scenarios  
573 and their potential effects on the evolutionary disparity/rate along a single branch in  
574 Figures 3 or 4. The results shed light on the empirical analyses by demonstrating the  
575 overlapping and distinct empirical patterns that can result from varying levels of  
576 developmental and functional integration in a simple closed system in the absence of  
577 environmental fluctuation (Fig. 6). As is expected from quantitative genetic theory  
578 (Cheverud 1984, Maynard-Smith et al. 1985), developmental and functional constraints  
579 can generate similar patterns (Fig. 6a and 6b). In all these cases, the overall entropy  
580 observed in the system over time remains low, with the system tending to become stuck  
581 or moving away very slowly from a suboptimal location (Fig 4c and 4e) or crawling  
582 slowly in concert along a gradient (Fig 6a and 6b). However, when both types of  
583 constraint are released, the system displays high entropy, with each trait able to  
584 independently jump between peaks (Fig. 6d). Such unconstrained movement would be  
585 expected to result in higher phenotypic disparity over macroevolutionary timescales by  
586 freeing individual lineages to generate novel character combinations when exposed to  
587 distinct and changing environments.

588         The patterns in increased evolutionary rate and entropy across traits displayed by  
589 the less constrained simulated diffusions provide mechanistic explanations that are

590 consistent with the bursts in evolutionary rate encountered throughout hominoid  
591 evolution. Although it is not possible in the empirical example to distinguish between  
592 functional and developmental integration as is done in the simulations, the general pattern  
593 of reduced integration that gives way to increased evolutionary rate is consistent between  
594 the two. Alternation between the varying strengths of integration as explored in the  
595 simulations would likely generate substantial novelty during periods of relaxed  
596 integration. Episodes of reduced developmental constraint (Figs. 2 and 5a) may have  
597 generated an initial burst of constructional opportunity that lead to rapid morphological  
598 diversification as ape populations were exposed to highly variable environments  
599 throughout the mid-Miocene. If the processes modelled in the simulations drove the  
600 patterns revealed in the empirical analyses, this sequence of events would represent true  
601 preadaptation in the sense that relaxed integration leads to increased mean population  
602 fitness. Under the evolutionary models explored here and elsewhere (Wagner 2018),  
603 stabilizing effects such as developmental canalization (Waddington 1959) or functional  
604 covariance (Cheverud 1984) would then be expected to re-constrain the newly divergent  
605 phenotypes after an initial burst in disparification. This dampened diffusive model was  
606 explored in early work in theoretical morphology that focused on the constrained filling  
607 of morphospace (Raup 1968).

608         The simulated diffusions and empirical pattern in evolutionary predisposition  
609 revealed here hint at the source of teleological concepts in human evolution. If the  
610 morphological and neurological traits can be assumed to have followed a multivariate  
611 Markovian diffusion that is at least qualitatively similar to the simulations in Figure 6

612 (especially Fig. 6a), the pattern in evolutionary rates along the path leading to humans  
613 may paint a misleading view that such changes have followed a progressive trend leading  
614 to a human-defined apex. However, the mosaic analysis here suggests that humans'  
615 biological uniqueness can be attributed to a relatively small number of anatomical  
616 rearrangements built over a longer diffusion into an area of developmental-morphospace  
617 occupied by all apes that is characterized by increased structural opportunity. Instead of  
618 treating humans as exceptional, this view suggests that the structural opportunities that  
619 emerged early in ape evolution may have freed the ancestors of currently extant taxa to  
620 blaze unique trajectories along a complex, multivariate adaptive landscape that would  
621 have been otherwise inaccessible. Structurally, all ape species might therefore be viewed  
622 as equally progressive in their evolution, with species-level differences in form and  
623 function shaped by stochastic differences in separate realized evolutionary paths along a  
624 shared adaptive landscape. Alternatively, separate taxa may have forged new and unique  
625 adaptive landscapes following speciation events as structural differences between newly  
626 isolated species drove the creation of new functional niches early in hominoid evolution.

627         The empirical and simulated analyses presented here are consistent with, although  
628 do not provide independent support for, a picture of morphological evolution that  
629 involves episodic diffusion across adaptive zones. However, the empirical and theoretical  
630 analyses allow for alternating and interacting roles for both ecological and constructional  
631 opportunity. This view can supplement many existing conceptions of adaptive radiation  
632 and key innovation by providing an alternative to ecological opportunity as a lone driving  
633 factor in the disparification of form. Instead, phenotypic disparity produced through

634 diffusion into a set of abundant adaptive zones can be directed and limited by the  
635 availability of structural opportunity. Nature surely merges these simplified extremes  
636 when shaping patterns in biodiversity (Seilacher 1991), and so increased emphasis on the  
637 interplay between ecological, developmental, and constructional factors will be a critical  
638 part of shaping a pluralistic understanding of the complex patterns and processes that  
639 have shaped the vast diversity across the tree of life.

640

641

642

643

644

645

646

647

648

649

650

651

652

653

654

655

656 **References**

- 657 Andrews P. 1992 Evolution and environment in the Hominoidea. *Nature* 360, 641–646.  
658 (doi:10.1038/360641a0)
- 659 Berge C. 1998 Heterochronic processes in human evolution: An ontogenetic analysis of  
660 the hominid pelvis. *American Journal of Physical Anthropology* 105, 441–459.  
661 (doi:10.1002/(sici)1096-8644(199804)105:4<441::aid-ajpa4>3.0.co;2-r)
- 662 Bock J. 1959 Preadaptation and multiple evolutionary pathways. *Evolution* 13, 194-211.
- 663 Boddy AM, McGowen MR, Sherwood CC, Grossman LI, Goodman M, Wildman DE.  
664 2012 Comparative analysis of encephalization in mammals reveals relaxed  
665 constraints on anthropoid primate and cetacean brain scaling. *Journal of*  
666 *Evolutionary Biology* 25, 981–994. (doi:10.1111/j.1420-9101.2012.02491.x)
- 667 Bouckaert R, Heled J, Kühnert D, Vaughan T, Wu C-H, Xie D, Suchard MA, Rambaut  
668 A, Drummond AJ. 2014 BEAST 2: A Software Platform for Bayesian  
669 Evolutionary Analysis. *PLoS Computational Biology* 10, e1003537.  
670 (doi:10.1371/journal.pcbi.1003537)
- 671 Capellini I, Venditti C, Barton, RA. 2010 Phylogeny and metabolic scaling in mammals.  
672 *Ecology*, 91, 2783-2793.
- 673 Charlesworth B, Lande R, Slatkin M. 1982 A Neo-Darwinian Commentary on  
674 Macroevolution. *Evolution* 36, 474–498. (doi:10.1111/j.1558-  
675 5646.1982.tb05068.x)
- 676 Chesson P. 2000 Mechanisms of maintenance of species diversity. *Annual Review of*  
677 *Ecology and Systematics*, 31, 343-366.

- 678 Cheverud JM. 1984 Quantitative genetics and developmental constraints on evolution by  
679 selection. *Journal of Theoretical Biology* 110, 155–171. (doi:10.1016/s0022-  
680 5193(84)80050-8)
- 681 Crouch NMA, Ricklefs RE. 2019 Speciation Rate Is Independent of the Rate of  
682 Evolution of Morphological Size, Shape, and Absolute Morphological  
683 Specialization in a Large Clade of Birds. *The American Naturalist* 193, E78–E91.  
684 (doi:10.1086/701630)
- 685 Donoghue MJ, Ree RH. 2000 Homoplasy and Developmental Constraint: A Model and  
686 an Example from Plants. *American Zoologist* 40, 759–769.  
687 (doi:10.1093/icb/40.5.759)
- 688 Donoghue MJ. 2005 Key innovations, convergence, and success: macroevolutionary  
689 lessons from plant phylogeny. *Paleobiology* 31, 77-93. (doi: 10.1666/0094-  
690 8373(2005)031[0077:KICASM]2.0.CO;2)
- 691 Felice RN, Goswami A. 2017 Developmental origins of mosaic evolution in the avian  
692 cranium. *Proceedings of the National Academy of Sciences* 115, 555–560.  
693 (doi:10.1073/pnas.1716437115)
- 694 Felsenstein J. 1985 Phylogenies and the comparative method. *The American Naturalist*,  
695 125, 1-15.
- 696 Fisher, DC. 1986 Progress in organismal design. Pp. 99-117 in: *Patterns and Processes in*  
697 *the History of Life*. Raup DM and Jablonski D, eds. Springer, Berlin, Heidelberg.
- 698 Goswami A, Binder WJ, Meachen J, O’Keefe FR. 2015 The fossil record of phenotypic  
699 integration and modularity: A deep-time perspective on developmental and



- 700 evolutionary dynamics. *Proceedings of the National Academy of Sciences* 112,  
701 4891–4896. (doi:10.1073/pnas.1403667112)
- 702 Goswami A, Smaers JB, Soligo C, Polly PD. 2014 The macroevolutionary consequences  
703 of phenotypic integration: from development to deep time. *Philosophical*  
704 *Transactions of the Royal Society B: Biological Sciences* 369, 20130254–  
705 20130254. (doi:10.1098/rstb.2013.0254)
- 706 Gould SJ, Vrba ES. 1982 Exaptation—a Missing Term in the Science of Form.  
707 *Paleobiology* 8, 4–15. (doi:10.1017/s0094837300004310)
- 708 Gould SJ and Lewontin RC. 1979 The spandrels of San Marco and the Panglossian  
709 paradigm: a critique of the adaptationist programme. *Proceedings of the Royal*  
710 *Society of London. Series B. Biological Sciences* 205, 581–598.  
711 (doi:10.1098/rspb.1979.0086)
- 712 Gould, SJ. 1977 *Ontogeny and Phylogeny*. Harvard University Press, Cambridge, USA.
- 713 Harmon LJ. 2003 Tempo and Mode of Evolutionary Radiation in Iguanian Lizards.  
714 *Science* 301, 961–964. (doi:10.1126/science.1084786)
- 715 Holloway RL. 1973 Endocranial volumes of early African hominids, and the role of the  
716 brain in human mosaic evolution. *Journal of Human Evolution* 2, 449–459.  
717 (doi:10.1016/0047-2484(73)90123-1)
- 718 Hunt KD. 2016 Why are there apes? Evidence for the co-evolution of ape and monkey  
719 ecomorphology. *Journal of Anatomy* 228, 630–685. (doi:10.1111/joa.12454)
- 720 Lewton KL. 2010 Locomotor function and the evolution of the primate pelvis. (Doctoral  
721 dissertation, Arizona State University).

- 722 Losos JB. 2010 Adaptive Radiation, Ecological Opportunity, and Evolutionary  
723 Determinism. *The American Naturalist* 175, 623–639. (doi:10.1086/652433)
- 724 Mahler DL, Ingram T, Revell LJ, Losos JB. 2013 Exceptional Convergence on the  
725 Macroevolutionary Landscape in Island Lizard Radiations. *Science* 341, 292–295.  
726 (doi:10.1126/science.1232392)
- 727 McHenry H. 1975 Fossils and the mosaic nature of human evolution. *Science* 190, 425–  
728 431. (doi:10.1126/science.809842)
- 729 Michel LA et al. 2014 Remnants of an ancient forest provide ecological context for Early  
730 Miocene fossil apes. *Nature Communications* 5. (doi:10.1038/ncomms4236)
- 731 Rice, SH. 2002. The role of heterochrony in primate brain evolution. In: Human  
732 evolution through developmental change. N. Minugh-Purvis & K.J. McNamara,  
733 eds. Johns Hopkins Univ. Press, Baltimore.
- 734 Seilacher A. 1991 Self-Organizing Mechanisms in Morphogenesis and Evolution. In  
735 Constructional Morphology and Evolution, pp. 251–271. Springer Berlin  
736 Heidelberg. (doi:10.1007/978-3-642-76156-0\_17)
- 737 Silvestro D, Salamin N, Schnitzler J. 2014 PyRate: a new program to estimate speciation  
738 and extinction rates from incomplete fossil data. *Methods in Ecology and*  
739 *Evolution* 5, 1126-1131.
- 740 Smith JM, Burian R, Kauffman S, Alberch P, Campbell J, Goodwin B, Lande R, Raup D,  
741 Wolpert L. 1985 Developmental Constraints and Evolution: A Perspective from  
742 the Mountain Lake Conference on Development and Evolution. *The Quarterly*  
743 *Review of Biology* 60, 265–287. (doi:10.1086/414425)

- 744 Smith SA, Brown JW, Yang Y, Bruenn R, Drummond CP, Brockington SF, Walker JF,  
745 Last N, Douglas N, Moore MJ. 2018 Disparity, Diversity, and Duplications in the  
746 Caryophyllales. *New Phytologist* 217, 836-854.
- 747 Olson ME. 2012 The developmental renaissance in adaptationism. *Trends in Ecology and*  
748 *Evolution* 27, 278–287. (doi:10.1016/j.tree.2011.12.005)
- 749 Olson EC and Miller RL. 1958. *Morphological Integration*. University of Chicago Press.
- 750 Parins-Fukuchi C. 2018 Bayesian placement of fossils on phylogenies using quantitative  
751 morphometric data. *Evolution* 72, 1801–1814. (doi:10.1111/evo.13516)
- 752 Parins-Fukuchi C. 2019 Detecting mosaic patterns in macroevolutionary disparity.  
753 *bioRxiv*, 423228.
- 754 Purvis A, Nee S, Harvey PH. 1995 Macroevolutionary inferences from primate  
755 phylogeny. *Proceedings of the Royal Society of London, Series B: Biological*  
756 *Sciences* 260, 329-333.
- 757 Rabosky DL, Santini F, Eastman J, Smith SA, Sidlauskas B, Chang J, Alfaro ME. 2013  
758 Rates of speciation and morphological evolution are correlated across the largest  
759 vertebrate radiation. *Nature Communications* 4. (doi:10.1038/ncomms2958)
- 760 Rabosky DL. 2014 Automatic Detection of Key Innovations, Rate Shifts, and Diversity-  
761 Dependence on Phylogenetic Trees. *PLoS One* 9, e89543.  
762 (doi:10.1371/journal.pone.0089543)
- 763 Rabosky DL, Grudler M, Anderson C, Title P, Shi JJ, Brown JW, Huang H, Larson JG.  
764 2014 BAMMtools: an R package for the analysis of evolutionary dynamics on

- 765 phylogenetic trees. *Methods in Ecology and Evolution* 5, 701–707.  
766 (doi:10.1111/2041-210x.12199)
- 767 Rainey PB, Travisano M. 1998 Adaptive radiation in a heterogeneous environment.  
768 *Nature* 394, 69–72. (doi:10.1038/27900)
- 769 Raup, DM. 1966 Geometric analysis of shell coiling: general problems. *Journal of*  
770 *Paleontology*, 1178-1190.
- 771 Raup DM. 1968 Theoretical morphology of echinoid growth. *Journal of Paleontology* 42,  
772 50-63.
- 773 Ruff CB. 1994 Morphological adaptation to climate in modern and fossil hominids.  
774 *American Journal of Physical Anthropology* 37, 65–107.  
775 (doi:10.1002/ajpa.1330370605)
- 776 Simpson GG. 1944 *Tempo and Mode in Evolution*. Columbia University Press. New  
777 York.
- 778 Slater GJ, Friscia AR. 2019 Hierarchy in adaptive radiation: A case study using the  
779 *Carnivora* (Mammalia). *Evolution* 73, 524–539. (doi:10.1111/evo.13689)
- 780 Slater GJ. 2015 Iterative adaptive radiations of fossil canids show no evidence for  
781 diversity-dependent trait evolution. *Proceedings of the National Academy of*  
782 *Sciences* 112, 4897–4902. (doi:10.1073/pnas.1403666111)
- 783 Sukumaran J, Holder MT. 2010 DendroPy: a Python library for phylogenetic computing.  
784 *Bioinformatics* 26, 1569–1571. (doi:10.1093/bioinformatics/btq228)
- 785 Stebbins GL. 1983 *Mosaic evolution: An integrating principle for the modern synthesis*.  
786 *Experientia* 39, 823–834. (doi:10.1007/bf01990398)

- 787 Stebbins GL. 1984 Mosaic evolution, mosaic selection and angiosperm phylogeny.  
788 Botanical Journal of the Linnean Society 88, 149–164. (doi:10.1111/j.1095-  
789 8339.1984.tb01568.x)
- 790 Turing AM. 1953 The chemical basis of morphogenesis. Philosophical Transactions of  
791 the Royal Society (part B) 237, 37-72.
- 792 Van Valen L. 1975 Group selection, sex, and fossils. *Evolution*, 29, 87-94.
- 793 Vos RA. 2006 Inferring large phylogenies: the big tree problem (Doctoral dissertation,  
794 Simon Fraser University)
- 795 Waddington CH. 1959 Canalization of Development and Genetic Assimilation of  
796 Acquired Characters. *Nature* 183, 1654–1655. (doi:10.1038/1831654a0)
- 797 Wagner CE, Harmon LJ, Seehausen O. 2012 Ecological opportunity and sexual selection  
798 together predict adaptive radiation. *Nature* 487, 366–369.  
799 (doi:10.1038/nature11144)
- 800 Wagner GP, Pavlicev M, Cheverud JM. 2007 The road to modularity. *Nature Reviews*  
801 *Genetics* 8, 921-931.
- 802 Wagner GP, Amemiya C, Ruddle F. 2003 Hox cluster duplications and the opportunity  
803 for evolutionary novelties. *Proceedings of the National Academy of Sciences* 100,  
804 14603–14606. (doi:10.1073/pnas.2536656100)
- 805 Wagner GP. 1988 The influence of variation and of developmental constraints on the rate  
806 of multivariate phenotypic evolution. *Journal of Evolutionary Biology* 1, 45–66.  
807 (doi:10.1046/j.1420-9101.1988.1010045.x)

808 Wagner PJ. 2018 Early bursts of disparity and the reorganization of character integration.

809 Proceedings of the Royal Society B: Biological Sciences 285, 20181604.

810 (doi:10.1098/rspb.2018.1604)

811 Worthington S. 2012 New approaches to late Miocene hominoid systematics: Ranking

812 morphological characters by phylogenetic signal (Doctoral dissertation, New

813 York University).

814 Yoder JB, et al. 2010 Ecological opportunity and the origin of adaptive radiations.

815 Journal of Evolutionary Biology 23, 1581–1596. (doi:10.1111/j.1420-

816 9101.2010.02029.x)

817 Young NM, Wagner GP, Hallgrímsson B. 2010 Development and the evolvability of

818 human limbs. Proceedings of the National Academy of Sciences 107, 3400–3405.

819 (doi:10.1073/pnas.0911856107)

820

821

822

823

824

825

826

827

828

829

830 **Tables**

| Clade            | Origination | Extinction | Net diversification | Preservation |
|------------------|-------------|------------|---------------------|--------------|
| Hominoidea       | 0.395       | 0.338      | 0.057               | 3.121        |
| Cercopithecoidea | 0.251       | 0.128      | 0.123               | 2.551        |

831

832 *Table 1.* Lineage diversification and preservation rate parameters estimated in apes

833 (Hominoidea) and Old World monkeys (Cercopithecoidea). Parameters were summarized

834 as the mean values from four million Markov-Chain Monte Carlo generations after

835 discarding 20% as burn-in.

836

837

838

839

840

841

842

843

844

845

846

847

848

849 **Figures**

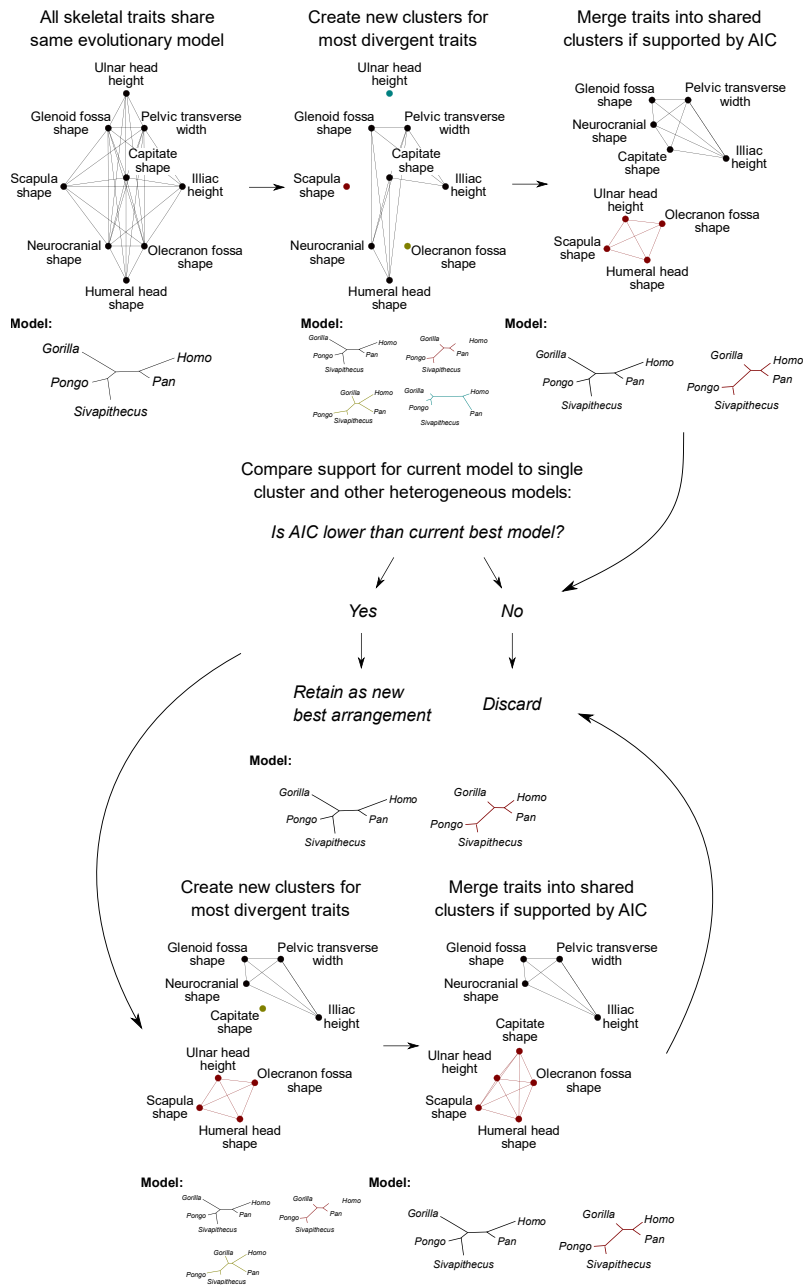

850

851 *Figure 1.* The mosaic inference procedure starts by modelling all characters under a  
 852 unified phylogenetic model. The algorithm then splits traits with divergent patterns in  
 853 disparity into their own suites and then greedily merges these suite fragments until the  
 854 AIC score ceases to improve. The splitting and merging steps are then alternated until the  
 40



855 AIC scores of the final merged models cease to improve. The best clustering achieved  
856 from this procedure represents the best-supported heterogeneous model of character  
857 integration.

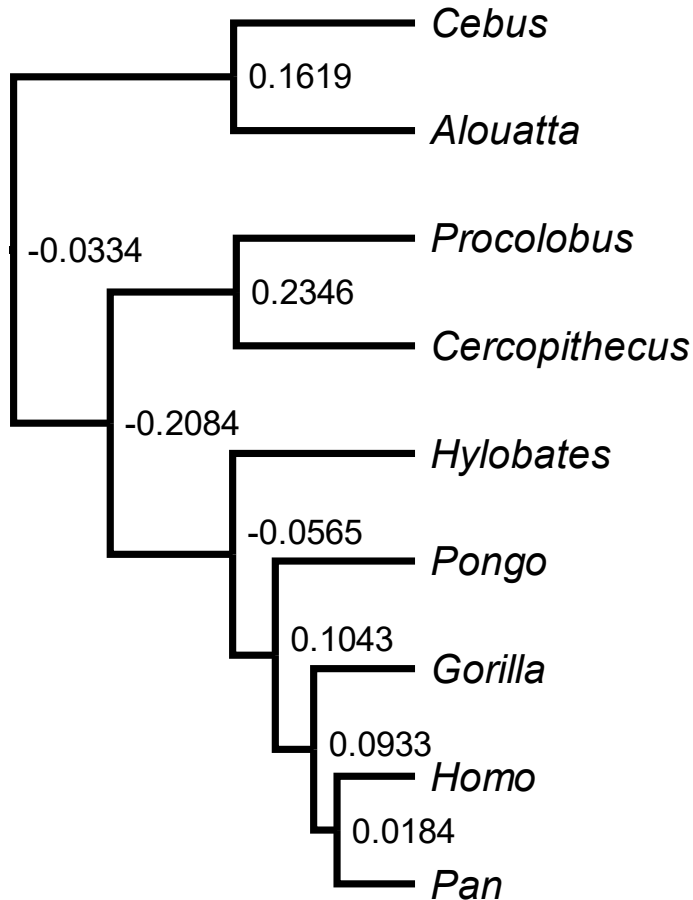

858  
859 *Figure 2.* Strength of integration across catarrhine evolution. Node labels correspond to  
860 the strength and polarity of correlation in the traits or phylogenetic independent contrasts  
861 (PICs) at each subtending node, depending on whether the child was a tip (traits) or  
862 internal node (PICs). Higher correlations in either direction (closer to either 1 or -1)  
863 indicate higher integration, while lower correlations (closer to 0) indicate weaker  
864 integration.

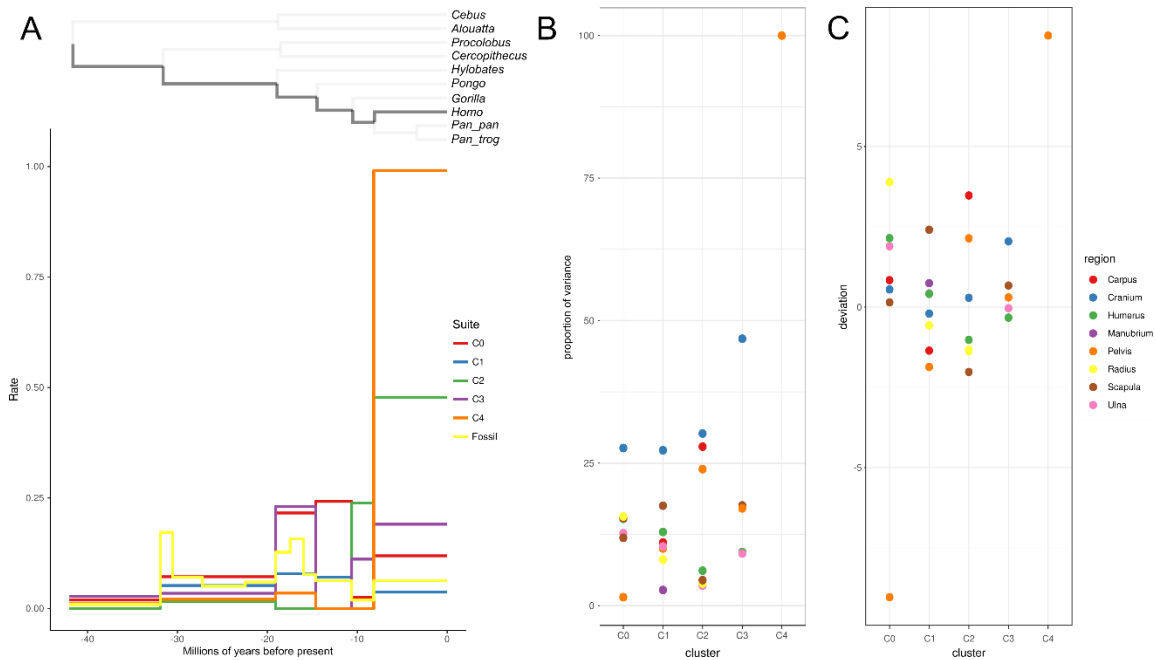

865

866 *Figure 3. A) Mosaic evolutionary rates calculated while walking back from Homo to the*

867 *last common ancestor of New World monkeys, Old World Monkeys, and apes. B)*

868 *Variance contributed to each suite by each skeletal region, estimated from a principal*

869 *component analysis. C) Skeletal regions over-represented in each mosaic evolutionary*

870 *suite. Values above zero correspond to regions that occupy a higher proportion of their*

871 *clusters than expected.*

872

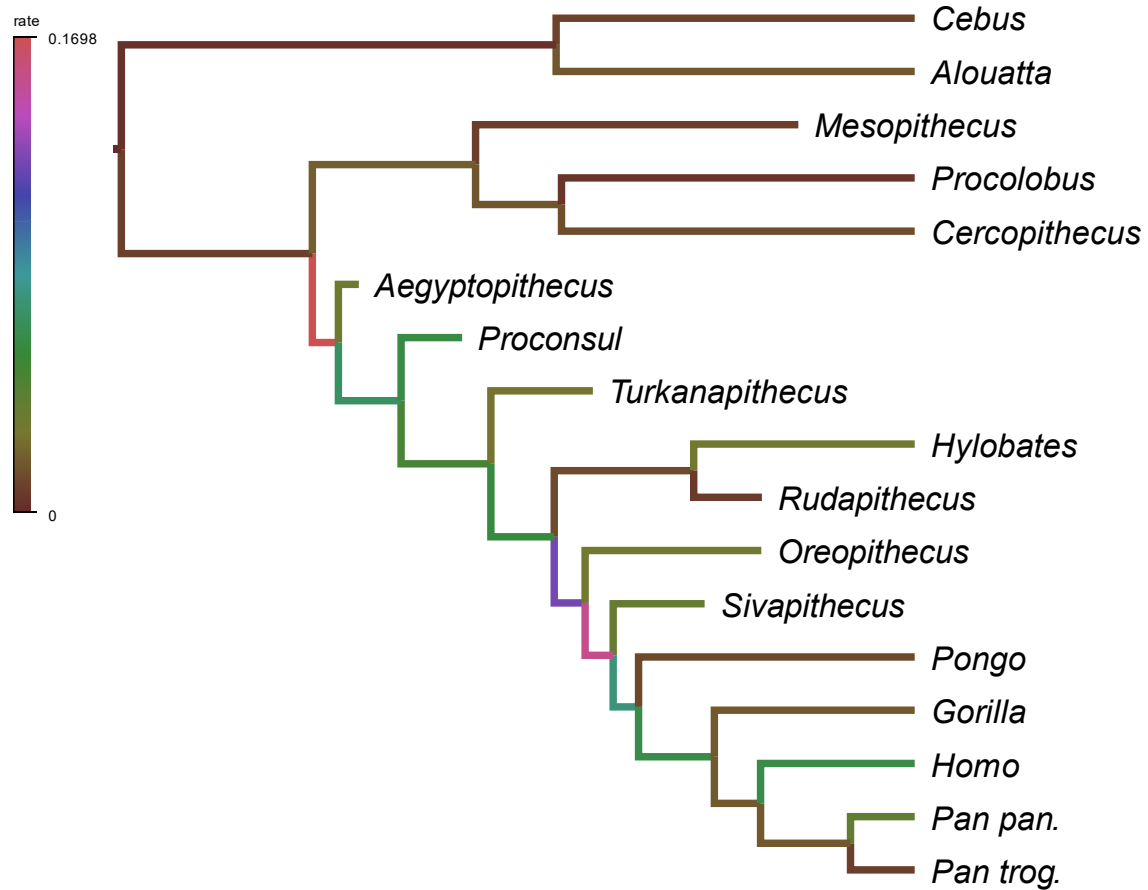

873

874 *Figure 4.* Placements of fossil genera on extant reference tree. Branch colors correspond  
875 to evolutionary rate along individual branches.

876

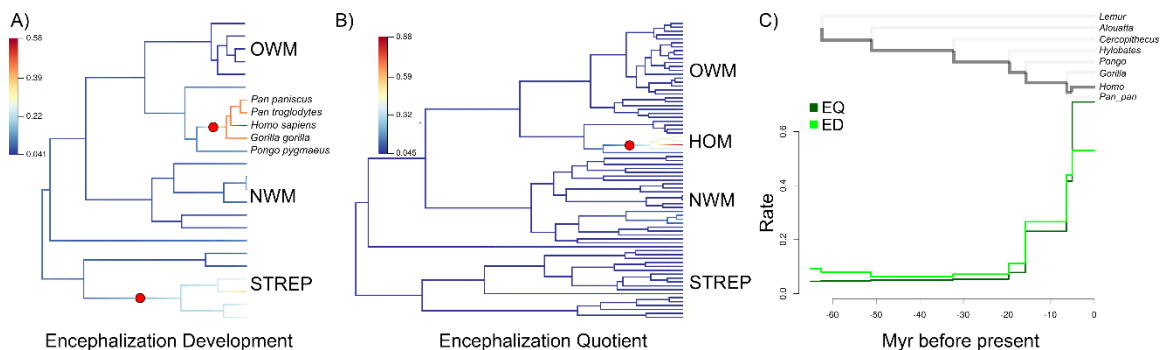

877

878 *Figure 5.* Rate shifts in A) encephalization development, and B) encephalization quotient.

879 C) Branch-specific evolutionary rates when tracing the lineage from *Homo* to the root.

43

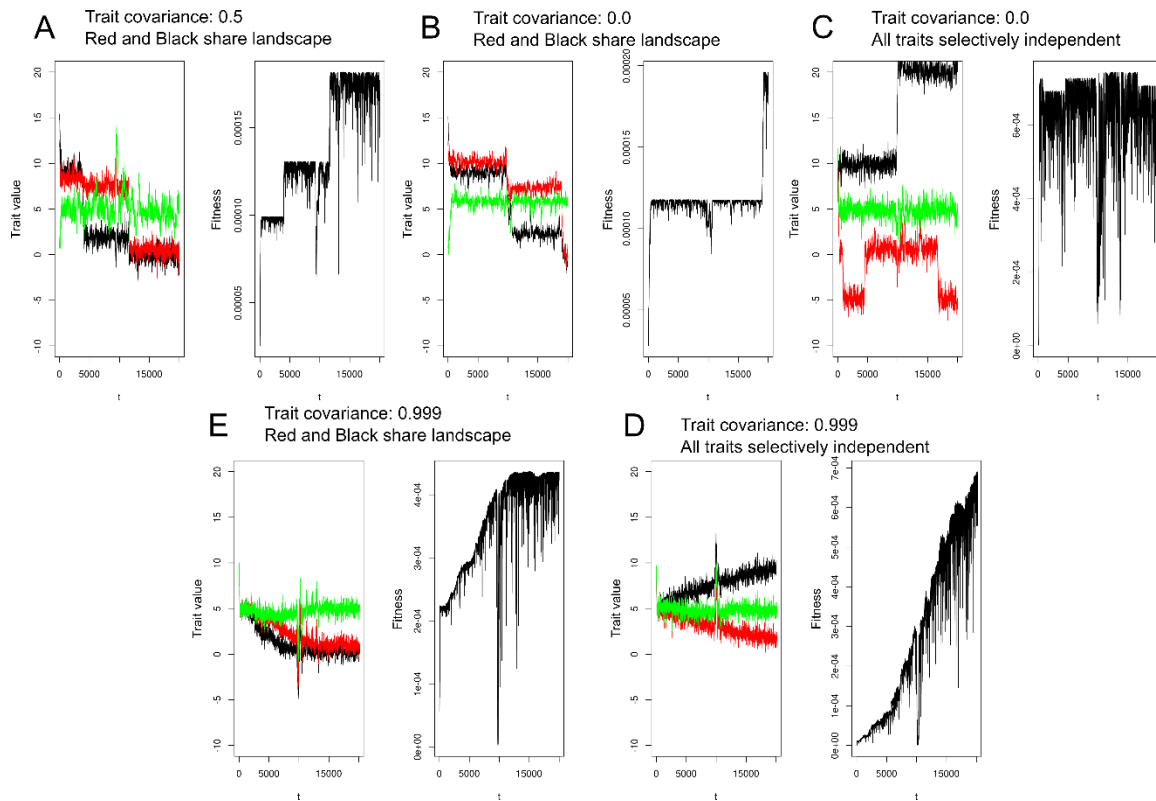

880

881 *Figure 6.* Monte Carlo simulations of integrated and atomized systems of three

882 continuous traits. Each box is a simulated diffusion between three traits under A)

883 moderate developmental linkage and shared selection, B) no developmental linkage and

884 shared selection, C) no developmental linkage and selective independence, D) high

885 developmental linkage and selective independence, and E) high developmental linkage

886 and shared selection.

887

888

889

890

891

892

| suite | skeletal region | trait                        |
|-------|-----------------|------------------------------|
| 0     | Ulna            | Olecranon length             |
| 0     | Ulna            | Middle shaft shape           |
| 0     | Ulna            | Olecranon shape              |
| 0     | Ulna            | Distal shape                 |
| 0     | Ulna            | Styloid process length       |
| 0     | Ulna            | Proximal shaft shape         |
| 0     | Ulna            | Coronoid                     |
| 0     | Ulna            | Trochlea notch shape         |
| 0     | Humerus         | Head P D shape               |
| 0     | Humerus         | Trochlea                     |
| 0     | Humerus         | Intertubercular angle        |
| 0     | Humerus         | Lat. trochlea keel dev.      |
| 0     | Humerus         | Bicipital groove shape       |
| 0     | Humerus         | Humeral Head Size            |
| 0     | Humerus         | Head torsion                 |
| 0     | Humerus         | Trochlea sup. notch angle    |
| 0     | Humerus         | Zona conoidea dist. depth    |
| 0     | Humerus         | Grt. tuberosity proj.        |
| 0     | Carpus          | Capitate head M L width      |
| 0     | Carpus          | Capitate M C 3 shape         |
| 0     | Carpus          | CAPCM4                       |
| 0     | Carpus          | Hamate DP depth COR          |
| 0     | Carpus          | Capitate head A P / P D      |
| 0     | Carpus          | Capitate dorsal nonarticular |
| 0     | Carpus          | Capitate M C 3 depth         |
| 0     | Carpus          | Lunate dist.                 |

|           |                                 |
|-----------|---------------------------------|
| 0 Carpus  | Hamate triquetral facet angle   |
| 0 Carpus  | Capitate M C 2 facets           |
| 0 Cranium | Grt. palatine foramen position  |
| 0 Cranium | Zygomatic root origin elevation |
| 0 Cranium | Basicranial length              |
| 0 Cranium | Piriform aperture shape         |
| 0 Cranium | Postglenoid projection          |
| 0 Cranium | Basicranium vs. palate          |
| 0 Cranium | Bregma position                 |
| 0 Cranium | Lacrimal fossa & orbital floor  |
| 0 Cranium | Facial projection               |
| 0 Cranium | Zygomax. tubercle A P width     |
| 0 Cranium | Basicranium vs. nuchal          |
| 0 Cranium | Nasoalveolar clivus length      |
| 0 Cranium | Head M L shape                  |
| 0 Cranium | Zygomatic                       |
| 0 Cranium | Face height vs. depth           |
| 0 Cranium | Piriform max. M L elevation     |
| 0 Cranium | Neurocranial shape              |
| 0 Cranium | Asterion angle                  |
| 0 Radius  | Lunate facet shape              |
| 0 Radius  | Lunate facet angle              |
| 0 Radius  | Neck shape                      |
| 0 Radius  | Scapholunate facet areas        |
| 0 Radius  | Lunate facet dorsal proj.       |
| 0 Radius  | Distal facets area              |
| 0 Radius  | Total length                    |

|           |                               |
|-----------|-------------------------------|
| 0 Radius  | Radial neck length            |
| 0 Radius  | Shaft curvature M L           |
| 0 Radius  | Head articular surface P D    |
| 0 Scapula | Trapezius insert angle        |
| 0 Scapula | Coraco                        |
| 0 Scapula | Inf. glenoid cor              |
| 0 Scapula | Acromian size                 |
| 0 Scapula | Inferior angle                |
| 0 Scapula | Sup. notch shape              |
| 0 Scapula | Spinatus ratio                |
| 0 Scapula | Glenoid vent. bar angle       |
| 0 Pelvis  | pubic symphysis length        |
| 1 Ulna    | Ulna head height              |
| 1 Ulna    | Semilunar keel angle          |
| 1 Ulna    | Radial notch shape            |
| 1 Ulna    | Distal shaft shape            |
| 1 Humerus | Dist. articular shape         |
| 1 Humerus | Trochlea dist. waisting       |
| 1 Humerus | Med. trochlea keel dev.       |
| 1 Humerus | Olecranon fossa depth         |
| 1 Humerus | Olecranon fossa shape         |
| 1 Carpus  | Capitate P D length           |
| 1 Carpus  | Hamate M C 4                  |
| 1 Carpus  | Lunate radial facet M L       |
| 1 Carpus  | Lunate triquetral facet shape |
| 1 Cranium | Piriform base M L width       |
| 1 Cranium | M1 shape                      |

|             |                                 |
|-------------|---------------------------------|
| 1 Cranium   | Lsr. palatine foramen           |
| 1 Cranium   | Molar crown areas               |
| 1 Cranium   | Entoglenoid width               |
| 1 Cranium   | Entoglenoid projection          |
| 1 Cranium   | Nasal bone M L width            |
| 1 Cranium   | Orbital margin M L width        |
| 1 Cranium   | Orbit area                      |
| 1 Cranium   | Interorbital width              |
| 1 Radius    | Distal surface shape            |
| 1 Radius    | Styloid process length          |
| 1 Radius    | Radial Head Shape               |
| 1 Manubrium | Manubrium shape                 |
| 1 Scapula   | Scapula Body shape              |
| 1 Scapula   | Trapezius med. insert           |
| 1 Scapula   | Superior angle                  |
| 1 Scapula   | Subscapular depth               |
| 1 Scapula   | Vertebral border length         |
| 1 Scapula   | Glenoid fossa shape             |
| 1 Scapula   | Coracoid length                 |
| 1 Pelvis    | ilium length                    |
| 1 Pelvis    | bi                              |
| 1 Pelvis    | anteroposterior pelvic diameter |
| 1 Pelvis    | pelvic length                   |
| 2 Humerus   | Epicondyles projection          |
| 2 Humerus   | Olecranon perforation           |
| 2 Ulna      | Shaft curvature A P             |
| 2 Carpus    | Capitate M C 3 waisting         |



|           |                             |
|-----------|-----------------------------|
| 2 Carpus  | Capitate waisting           |
| 2 Carpus  | Lunate PD Length            |
| 2 Carpus  | Hamate hamulus P D proj.    |
| 2 Carpus  | Capitate M C 2 margin       |
| 2 Carpus  | Capitate M C 2 orientation  |
| 2 Carpus  | Lunate dist. facet shape    |
| 2 Cranium | Orbit shape                 |
| 2 Cranium | Pterion post. config        |
| 2 Cranium | Palate shape                |
| 2 Cranium | Lacrimal fossa visibility   |
| 2 Cranium | Palatine width              |
| 2 Cranium | Postorbital constriction    |
| 2 Cranium | Palate depth                |
| 2 Radius  | Head depth P D              |
| 2 Scapula | Glenoid fossa depth         |
| 2 Pelvis  | illium width                |
| 2 Pelvis  | ischium length              |
| 2 Pelvis  | AIS to hip joint            |
| 2 Pelvis  | inferior pubic ramus length |
| 2 Pelvis  | acetabulum diameter         |
| 2 Pelvis  | superior pubic ramus length |
| 3 Scapula | Spinoglenoid notch depth    |
| 3 Scapula | Infraglenoid tuberosity M L |
| 3 Pelvis  | lower illiac height         |
| 3 Pelvis  | inferior pubic ramus cross  |
| 3 Ulna    | Radial notch depth          |
| 3 Cranium | Temporal fossa width        |

|           |                                      |
|-----------|--------------------------------------|
| 3 Cranium | Face vs. nasal height                |
| 3 Cranium | Face height vs. width                |
| 3 Cranium | Palate width                         |
| 3 Cranium | Entoglenoid lat. pterygoid           |
| 3 Humerus | Medial trochlea keel & medial epicon |
| 4 Pelvis  | ischium cross                        |
| 4 Pelvis  | superior pubic ramus cross           |
| 4 Pelvis  | upper illiac height                  |
| 4 Pelvis  | lower ilium cross                    |
| 4 Pelvis  | ischium dorsal projection            |
| 4 Pelvis  | pubic symphysis                      |
| 4 Pelvis  | auricular surface area               |
| 4 Pelvis  | biacetabular diameter                |
| 4 Pelvis  | maximum transverse diameter          |
| 4 Pelvis  | sacrum width                         |

893

894 **Table S1:** List of traits and their skeletal regions that comprise each of the mosaic suites detected  
895 from the skeletal data.

896
